# Supplementary material for: The Role of The Individualism-Collectivism Dimension in Shaping Policy-Support for EU Disaster-Relief
Source: Research Square preprint supplement (doi:10.21203/rs.3.rs-7775352/v1), 2025-11-18
Supplement: Supplementary file 1 [file ca317af6fbd8a7a899b04459.docx]

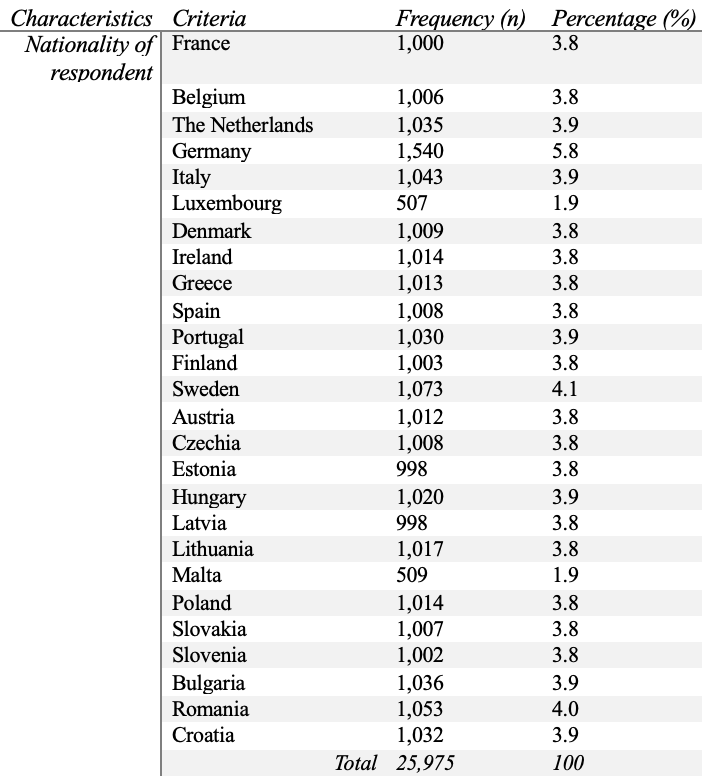


Table 1: Eurobarometer Sample Description (1)


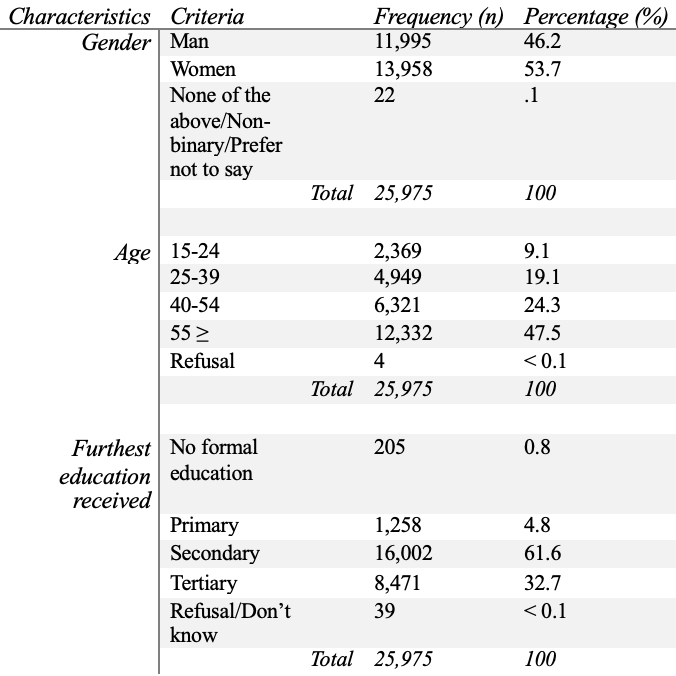


Table 2: Eurobarometer Sample Description (2)

| Model | Adjusted R² | Individualism (β, p) | Control Variable (β, p) | Model Sig. (p) |
| --- | --- | --- | --- | --- |
| Carbon Emissions | 0.304 | -0.562, 0.003 | 0.259, 0.136 | 0.006 |
| Mean Years of Schooling | 0.239 | -0.515, 0.010 | -0.086, 0.644 | 0.017 |
| GDP | 0.280 | -0.592, 0.003 | 0.217, 0.227 | 0.009 |

Table 3: Regression models of control variables in the relationship between individualism and support for intra-EU disaster relief
